# Supplementary material for: Caucasian Families Exhibit Significant Linkage of Myopia to Chromosome 11p
Source: PubMed Central journal article supplement — Invest Ophthalmol Vis Sci. 2017 Jul;58(9):3547–54. doi: 10.1167/iovs.16-21271 (PMC5510992; doi:10.1167/iovs.16-21271), 2017-07
Supplement: iovs-58-07-52_s01.pdf [file iovs-58-07-52_s01.pdf]

Supplementary Table S1: Genome-wide Single Variant Two-point Suggestive SNPs (excluding Chromosome 11)

| CHR | rsID       | POS       | LOD    | HLOD    | ALPHA | FUNCTION   | GENE                        |
|-----|------------|-----------|--------|---------|-------|------------|-----------------------------|
| 8   | rs10092658 | 130980472 | 2.4567 | 2.4567  | 1.00  | intergenic | <i>FAM49B, MIR5194</i>      |
| 7   | rs1882077  | 37436929  | 2.4312 | 2.4312  | 1.00  | intronic   | <i>ELMO1</i>                |
| 7   | rs6462611  | 35576505  | 2.4145 | 2.4145  | 1.00  | intergenic | <i>LOC401324, HERPUD2</i>   |
| 7   | rs1882078  | 37436975  | 2.3921 | 2.3921  | 1.00  | intronic   | <i>ELMO1</i>                |
| 2   | rs13420028 | 133188106 | 2.2996 | 2.2996  | 1.00  | intronic   | <i>GPR39</i>                |
| 10  | rs12256826 | 67974590  | 2.1979 | 2.2933  | 0.85  | intronic   | <i>CTNNA3</i>               |
| 7   | rs1962235  | 36972188  | 2.2301 | 2.2672  | 0.90  | intronic   | <i>ELMO1</i>                |
| 7   | rs4720262  | 37888627  | 2.2539 | 2.2539  | 1.00  | UTR5       | <i>NME8</i>                 |
| 7   | rs2541090  | 37308230  | 2.0452 | 2.1395  | 0.85  | intronic   | <i>ELMO1</i>                |
| 7   | rs1079866  | 41470093  | 2.0387 | 2.0916  | 0.85  | intergenic | <i>LINC01449, INHBA</i>     |
| 7   | rs7808629  | 36702492  | 2.0605 | 2.0605  | 1.00  | intronic   | <i>AOAH</i>                 |
| 6   | rs2842899  | 132859609 | 1.9342 | 2.0434  | 0.80  | exonic     | <i>TAAR9</i>                |
| 4   | rs17610371 | 100712656 | 2.0262 | 2.0416  | 0.90  | intergenic | <i>MTTP, DAPP1</i>          |
| 6   | rs41265385 | 170068086 | 2.0210 | 2.0210  | 1.00  | exonic     | <i>WDR27</i>                |
| 7   | rs1894910  | 36777888  | 1.6146 | 1.9841  | 0.70  | intergenic | <i>AOAH, ELMO1</i>          |
| 7   | rs4077337  | 36729324  | 1.7253 | 1.9793  | 0.80  | intronic   | <i>AOAH</i>                 |
| 6   | rs58858262 | 87500445  | 1.9766 | 1.9766  | 1.00  | intergenic | <i>SNHG5, HTR1E</i>         |
| 1   | rs61787373 | 110888948 | 1.9658 | 1.97366 | 0.95  | exonic     | <i>RBM15</i>                |
| 7   | rs2011974  | 32611392  | 1.9375 | 1.9427  | 0.95  | intronic   | <i>AVL9</i>                 |
| 1   | rs12742611 | 18475260  | 1.9418 | 1.9418  | 1.00  | intronic   | <i>IGSF21</i>               |
| 4   | rs2010907  | 189540683 | 1.9089 | 1.9105  | 0.95  | intergenic | <i>LINC01060, LINC01262</i> |

Table showing the genome-wide suggestive SNPs from the single variant two-point linkage analysis sorted by heterogeneity LOD score (HLOD), excluding those found on chromosome 11 (see Table 1). CHR = chromosome position, POS = position in base pairs, LOD = cumulative LOD score across all 56 families. The significance threshold is 3.3 and the suggestive threshold is 1.9, as recommended by Lander and Kruglyak. Gene annotations were performed by ANNOVAR.

Supplementary Table S2: Genome-wide Multipoint Suggestive Variants

| CHR | rsID        | POSITION | LOD     | HLOD   | ALPHA | FUNCTION   | GENE                    |
|-----|-------------|----------|---------|--------|-------|------------|-------------------------|
| 20  | rs34323943  | 52192637 | -0.2125 | 3.0480 | 0.50  | intronic   | <i>ZNF217</i>           |
| 20  | rs2800999   | 51722623 | -0.9340 | 2.8380 | 0.45  | intronic   | <i>TSHZ2</i>            |
| 20  | rs6022758   | 52425620 | -0.9170 | 2.7930 | 0.45  | intronic   | <i>ZNF217, SUMO1P1</i>  |
| 20  | D20S480     | 51857207 | -0.9935 | 2.7780 | 0.45  | intronic   | <i>TSHZ2</i>            |
| 20  | rs856427    | 51251485 | -1.3910 | 2.6320 | 0.45  | intronic   | <i>LINC01524</i>        |
| 20  | rs6013382   | 50702633 | -1.4470 | 2.5290 | 0.40  | intronic   | <i>ZFP64</i>            |
| 20  | rs4809959   | 52785859 | -1.4460 | 2.3880 | 0.40  | intronic   | <i>CYP24A1</i>          |
| 20  | rs2022371   | 53196113 | -1.4710 | 2.3750 | 0.40  | intronic   | <i>DOK5</i>             |
| 20  | rs149617699 | 49989435 | -1.5750 | 2.3170 | 0.40  | intronic   | <i>KCNQ1, NFATC2</i>    |
| 20  | rs6092326   | 55116737 | -1.7410 | 2.3000 | 0.40  | intronic   | <i>FAM209B, TFAP2C</i>  |
| 20  | rs2426689   | 55369594 | -1.6940 | 2.2590 | 0.40  | intronic   | <i>TFAP2C, BMP7</i>     |
| 20  | rs731803    | 54507813 | -2.0820 | 2.2310 | 0.40  | intronic   | <i>LINC01441, CBLN4</i> |
| 20  | rs6024653   | 54751363 | -2.0210 | 2.2310 | 0.40  | intronic   | <i>CBLN4, MC3R</i>      |
| 20  | rs3852925   | 54067599 | -2.3605 | 2.1500 | 0.40  | intronic   | <i>LINC01441, CBLN4</i> |
| 11  | rs10766542  | 19352288 | -0.6610 | 2.0730 | 0.45  | intergenic | <i>E2F8, NAV2</i>       |
| 11  | rs874426    | 19569563 | -0.4110 | 2.0070 | 0.45  | intronic   | <i>NAV2</i>             |

Table showing the genome-wide suggestive SNPs from the multipoint linkage analysis sorted by heterogeneity LOD score (HLOD). CHR = chromosome position, POSITION = position in base pairs, LOD = cumulative LOD score across all 56 families. The significance threshold is 3.3 and the suggestive threshold is 1.9, as recommended by Lander and Kruglyak. Gene annotations were performed by ANNOVAR.
